# Supplementary material
Source: PubMed Central journal article supplement (PMC11102758)

# Supplementary Figure 1

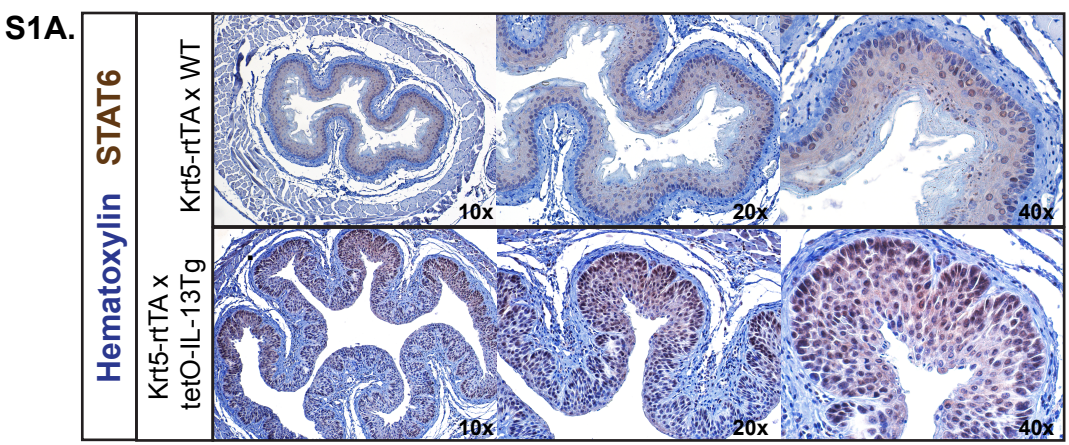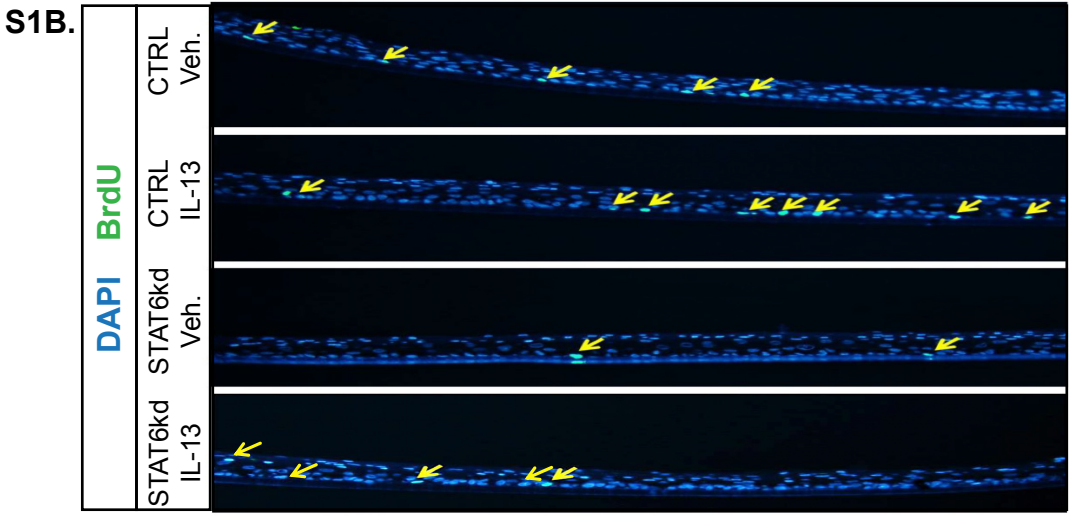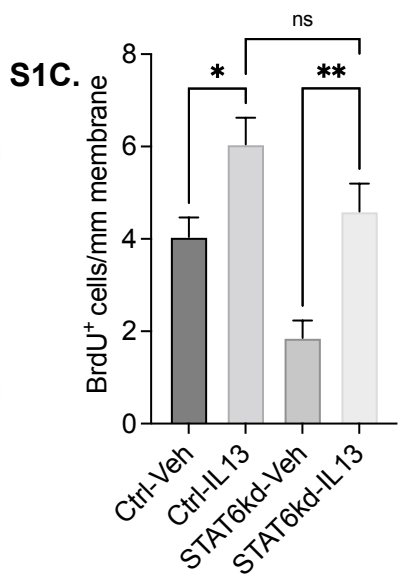

Supplement: NIHMS1993959-supplement-Supplementary_Figure_S1.pdf [file NIHMS1993959-supplement-Supplementary_Figure_S1.pdf]

# Supplementary Figure 2

A.

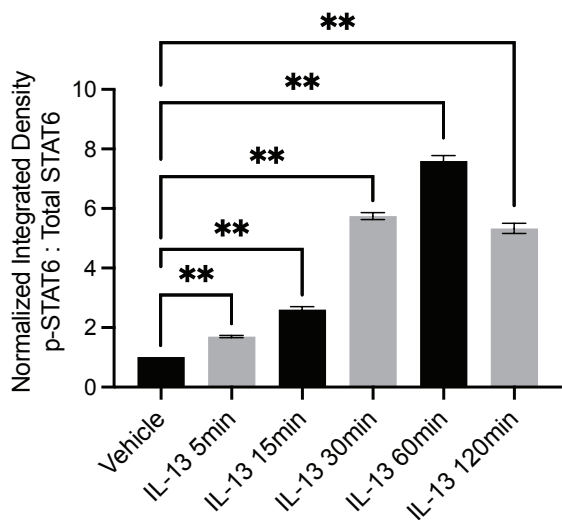

B.

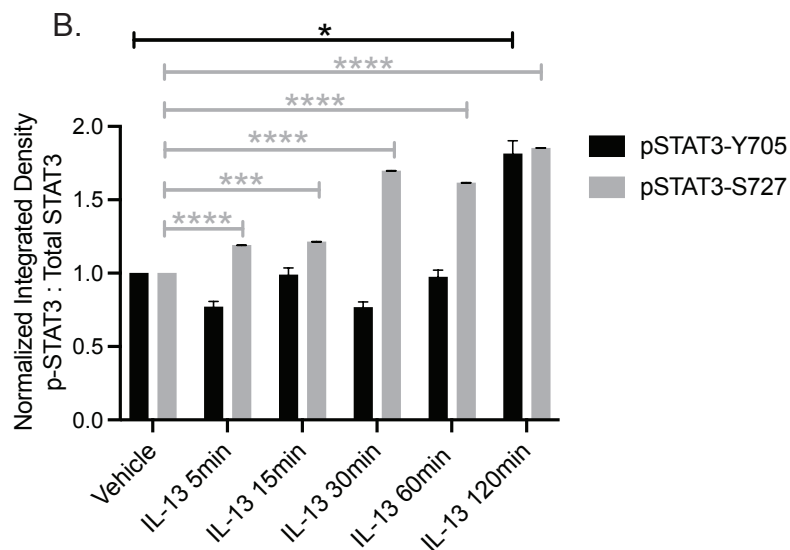

C.

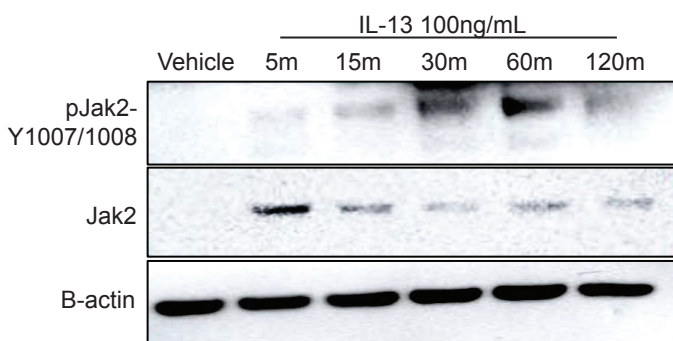

D.

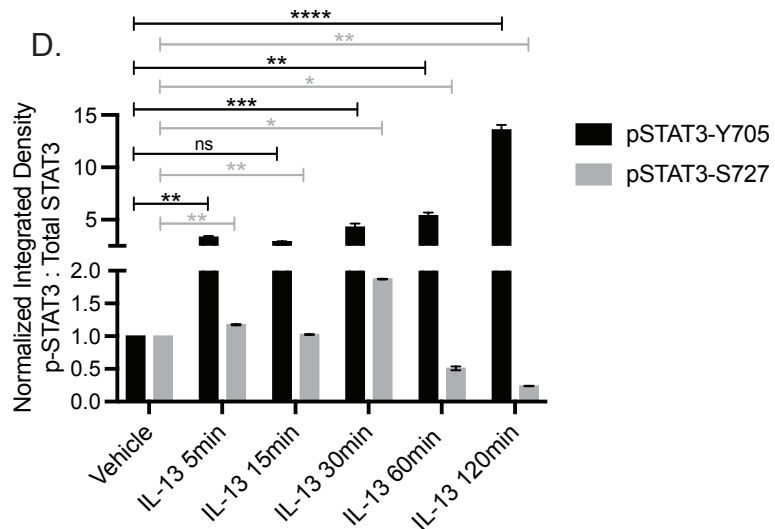

E.

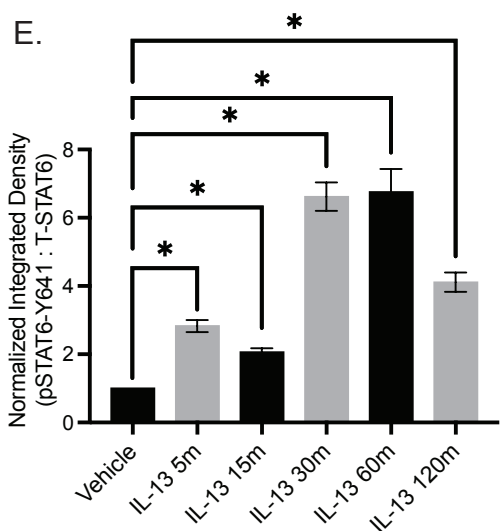

Supplement: NIHMS1993959-supplement-Supplementary_Figure_S2.pdf [file NIHMS1993959-supplement-Supplementary_Figure_S2.pdf]
